# Supplementary material
Source: PubMed Central journal article supplement (PMC3189082)
Supplement: 1109861108_pnas.1109861108_SI.pdf [file 1109861108_pnas.1109861108_SI.pdf]

# Supporting Information

Unadkat et al. 10.1073/pnas.1109861108

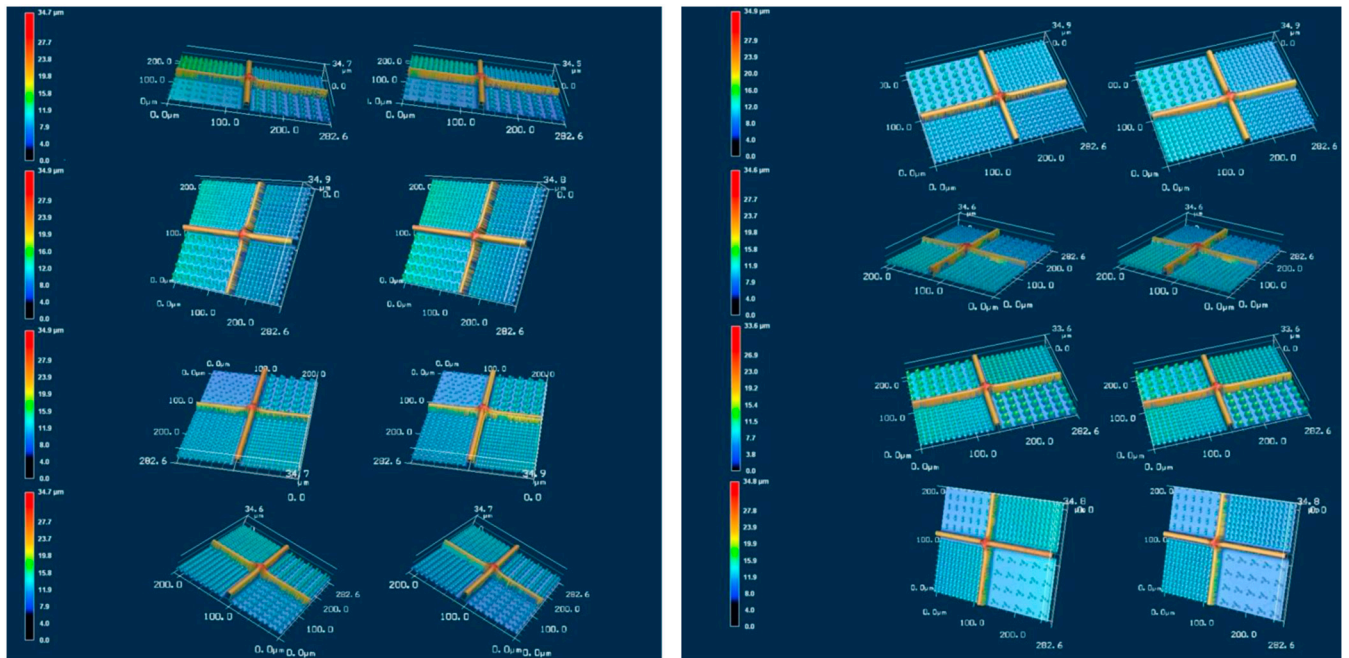

Fig. S1. Height profiles of TopoUnits measured using confocal laser scanning microscopy. Each image has four representative areas of TopoUnits. In total 32 individual TopoUnits were analyzed for replication efficiency.

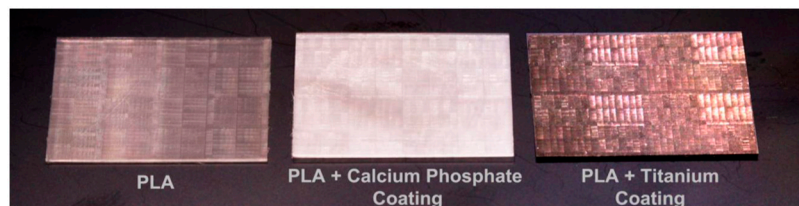

Fig. S2. Conventional PLA TopoChip (left) as well as TopoChips coated with calcium phosphate (middle) and titanium (right).



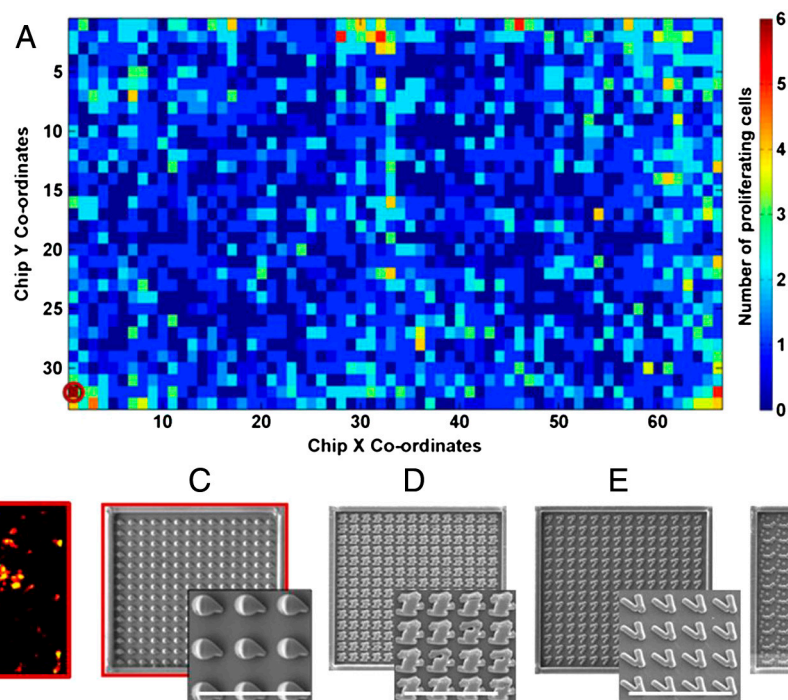

**Fig. S4.** Cell proliferation assay. (A) Heat map of mean proliferating cell count of cells grown on different topographies. The TopoUnit showing the maximum number of proliferating cells is marked with a red circle. (B) Fluorescently stained pseudocolored merged image of hMSCs on the highest scoring TopoUnit. In this image the Alexa Fluor 488 EdU (representing proliferating cells) is pseudocolored yellow whereas TOTO-3 (nucleic acid stain representing all the nuclei) is pseudocolored red. (C–F) SEM images of the TopoUnits showing the highest score for proliferating cells. The insets show higher magnification views of features. (Scale bar: 50  $\mu\text{m}$ .)

**Table S1. Overview of parameter values and ranges used to construct features**

| Parameter                                                        | Value or range                                            |
|------------------------------------------------------------------|-----------------------------------------------------------|
| Feature side length                                              | 10 $\mu\text{m}$ , 20 $\mu\text{m}$ , or 28 $\mu\text{m}$ |
| No. of primitives used (10 $\mu\text{m}$ )                       | 3–5                                                       |
| No. of primitives used (20 $\mu\text{m}$ )                       | 3–12                                                      |
| No. of primitives used (28 $\mu\text{m}$ )                       | 3–16                                                      |
| Diameter of a circle primitive (10 $\mu\text{m}$ )               | 3.0 $\mu\text{m}$ –4.0 $\mu\text{m}$                      |
| Diameter of a circle primitive (20 $\mu\text{m}$ )               | 3.0 $\mu\text{m}$ –10.0 $\mu\text{m}$                     |
| Diameter of a circle primitive (28 $\mu\text{m}$ )               | 3.0 $\mu\text{m}$ –10.0 $\mu\text{m}$                     |
| Shortest side length of a triangle primitive (10 $\mu\text{m}$ ) | 3.0 $\mu\text{m}$ –4.0 $\mu\text{m}$                      |
| Shortest side length of a triangle primitive (20 $\mu\text{m}$ ) | 3.0 $\mu\text{m}$ –8.0 $\mu\text{m}$                      |
| Shortest side length of a triangle primitive (28 $\mu\text{m}$ ) | 3.0 $\mu\text{m}$ –10.0 $\mu\text{m}$                     |
| Top angle of a triangle primitive                                | 36°                                                       |
| Length of a line primitive (10 $\mu\text{m}$ )                   | 3.0 $\mu\text{m}$ –8.0 $\mu\text{m}$                      |
| Length of a line primitive (20 $\mu\text{m}$ )                   | 3.0 $\mu\text{m}$ –16.0 $\mu\text{m}$                     |
| Length of a line primitive (28 $\mu\text{m}$ )                   | 3.0 $\mu\text{m}$ –23.0 $\mu\text{m}$                     |
| Thickness of a line primitive                                    | 3 $\mu\text{m}$                                           |
| Standard deviation for the rotation of a primitive               | 0.0°–180.0°                                               |

**Table S2. Overview of additional parameter values used for detecting parameters leading to enhanced proliferation**

| Variable | Description                                                            |
|----------|------------------------------------------------------------------------|
| DC       | The density of circle primitives                                       |
| DT       | The density of triangle primitives                                     |
| DL       | The density of line primitives                                         |
| CA       | The area of circle primitives scaled with their density                |
| TA       | The area of triangle primitives scaled with their density              |
| LA       | The area of line primitives scaled with their density                  |
| ROT      | The scaled standard deviation of the rotation of primitives            |
| CCD      | Number of color changes of the feature over the diagonal               |
| WN0.1    | The fraction of energy in the signal with wavenumber approximately 0.1 |
| WN0.2    | The fraction of energy in the signal with wavenumber approximately 0.2 |
| WN0.3    | The fraction of energy in the signal with wavenumber approximately 0.3 |
| WN0.4    | The fraction of energy in the signal with wavenumber approximately 0.4 |
| WN0.5    | The fraction of energy in the signal with wavenumber approximately 0.5 |
| WN0.7    | The fraction of energy in the signal with wavenumber approximately 0.7 |
| WN1      | The fraction of energy in the signal with wavenumber approximately 1   |
| WN1.5    | The fraction of energy in the signal with wavenumber approximately 1.5 |
| WN2      | The fraction of energy in the signal with wavenumber approximately 2   |
| WN3      | The fraction of energy in the signal with wavenumber approximately 3   |
| WN4      | The fraction of energy in the signal with wavenumber approximately 4   |
